# Supplementary material for: Carotid plaque and bone density and microarchitecture in psoriatic arthritis: the correlation with soluble ST2
Source: PubMed Central journal article supplement (PMC4995470; doi:10.1038/srep32116), 2016-08-24
Supplement: srep32116-s1.pdf [file srep32116-s1.pdf]

**Title:** Carotid plaque and bone density and microarchitecture in psoriatic arthritis: the correlation with soluble ST2

**Authors:**

Jiayun Shen<sup>1</sup>, PhD, Qing Shang<sup>1</sup>, PhD, Chun-Kwok Wong<sup>2</sup>, PhD, Edmund K. Li<sup>1</sup>, MD, Emily W Kun<sup>3</sup>, FRCP, Isaac T. Cheng<sup>1</sup>, BSc, Martin Li<sup>1</sup>, PhD, Tena K. Li<sup>1</sup>, BN, Tracy Y. Zhu<sup>4</sup>, PhD, Cheuk-Man Yu<sup>1</sup>, MD, Ling Qin<sup>4</sup>, PhD, Lai-Shan Tam<sup>\*1</sup>, MD.

**Affiliated institution:**

<sup>1</sup>Department of Medicine & Therapeutics, The Prince of Wales Hospital, The Chinese University of Hong Kong, Hong Kong; <sup>2</sup>Department of Chemical Pathology, The Prince of Wales Hospital, The Chinese University of Hong Kong, Hong Kong, <sup>3</sup>Department of Medicine and Geriatrics, Taipo Hospital, Hong Kong, <sup>4</sup>Bone Quality and Health Center of the Department of Orthopedics & Traumatology, The Prince of Wales Hospital, The Chinese University of Hong Kong, Hong Kong.

Supplementary Table 1. Anthropometric and clinical characteristics of patients without cardiovascular diseases

|                              | All (n=71)      | Carotid plaque  |                 | P value      |
|------------------------------|-----------------|-----------------|-----------------|--------------|
|                              |                 | No (n=45)       | Yes (n=26)      |              |
| Male gender, n(%)            | 39(54.9%)       | 22(48.9%)       | 17(65.4%)       | 0.178        |
| Age (years)                  | <b>51.7±9.5</b> | <b>49.7±9.8</b> | <b>55.2±7.9</b> | <b>0.018</b> |
| PsA characteristics          |                 |                 |                 |              |
| PsA disease duration (years) | <b>13.9±7.0</b> | <b>12.1±6.8</b> | <b>17.0±6.4</b> | <b>0.004</b> |
| Tender joint count (0-68)    | 0(0-2)          | 0(0-2)          | 0(0-1)          | 0.460        |
| Swollen joint count (0-66)   | 0(0-1)          | 0(0-0)          | 0(0-2)          | 0.149        |
| Damaged joint count (0-68)   | 2(0-6)          | 2(0-4)          | 2(0-9)          | 0.176        |
| VAS Pain (0-100)             | 30(10-50)       | 30(20-50)       | 30(10-60)       | 0.947        |
| Patients' global (0-100)     | 50(20-60)       | 40(20-60)       | 50(30-60)       | 0.368        |
| Physicians' global (0-100)   | 20(7-40)        | 20(6-35)        | 23(10-40)       | 0.461        |
| PASI (0-72)                  | 2.2 (0.7-6.5)   | 2.7 (0.9-6.2)   | 1.8 (0.5-10.8)  | 0.862        |
| HAQ (0-3)                    | 0.13(0-0.50)    | 0.13(0-0.38)    | 0.31(0-0.75)    | 0.225        |

|                                         |                  |                  |                  |              |
|-----------------------------------------|------------------|------------------|------------------|--------------|
| MDA, n(%)                               | 13(18.3%)        | 10(22.2%)        | 3(11.5%)         | 0.348        |
| ESR (mm/1 <sup>st</sup> hr)             | 15(7-28)         | 15(7-29)         | 15(6-28)         | 0.831        |
| CRP (mg/dl)                             | 0.3(0.1-0.7)     | 0.3(0.1-0.6)     | 0.4(0.1-0.8)     | 0.391        |
| CV and osteoporosis risk factors        |                  |                  |                  |              |
| Body weight (kg)                        | 68.2±14.0        | 68.6±15.5        | 67.4±11.0        | 0.725        |
| BMI (kg/m <sup>2</sup> )                | 25.5±4.3         | 25.8±4.6         | 24.9±3.6         | 0.385        |
| Systolic BP (mmHg)                      | 128±15           | 127±15           | 128±16           | 0.779        |
| Diastolic BP (mmHg)                     | 82±10            | 82±10            | 82±11            | 0.917        |
| Hypertension, n(%)                      | 38(53.5%)        | 24(53.3%)        | 14(53.8%)        | 0.967        |
| Diabetes, n(%)                          | 11(15.5%)        | 6(13.3%)         | 5(19.2%)         | 0.516        |
| Hyperlipidemia, n(%)                    | 17(23.9%)        | 8(17.8%)         | 9(34.6%)         | 0.109        |
| Metabolic syndrome, n(%)                | 20(28.2%)        | 14(31.1%)        | 6(23.1%)         | 0.434        |
| Framingham 10-year CVD risk > 10%, n(%) | <b>31(43.7%)</b> | <b>15(33.3%)</b> | <b>16(61.5%)</b> | <b>0.021</b> |
| Total cholesterol (mmol/L)              | 5.0±0.9          | 5.0±0.8          | 5.1±0.9          | 0.601        |
| HDL cholesterol (mmol/L)                | 1.4±0.4          | 1.4±0.4          | 1.4±0.4          | 0.863        |
| Triglycerides (mmol/L)                  | 1.5±0.9          | 1.5±1.1          | 1.4±0.6          | 0.368        |
| Fasting glucose (mmol/L)                | 5.6±1.8          | 5.7±1.9          | 5.4±1.6          | 0.463        |

|                                     |                |                |                 |                  |
|-------------------------------------|----------------|----------------|-----------------|------------------|
| Post-menopause women,<br>n(%)       | 18(56.3%)      | 13(56.5%)      | 5(55.6%)        | 0.999            |
| Current smoker, n(%)                | 8(11.3%)       | 5(11.1%)       | 3(11.5%)        | 0.999            |
| Current drinker, n(%)               | 1(1.4%)        | 1(2.2%)        | 0(0%)           | 0.999            |
| Parent history of fracture,<br>n(%) | 7(9.9%)        | 5(11.1%)       | 2(7.7%)         | 0.999            |
| History of fracture, n(%)           | 6(8.5%)        | 3(6.7%)        | 3(11.5%)        | 0.662            |
| Current medications, n (%)          |                |                |                 |                  |
| Anti-hypertensive                   | 36(50.7%)      | 23(51.1%)      | 13(50.0%)       | 0.928            |
| Statins                             | 10(14.1%)      | 4(8.9%)        | 6(23.1%)        | 0.155            |
| NSAIDs                              | 32(45.1%)      | 21(46.7%)      | 11(42.3%)       | 0.722            |
| Steroids                            | 2(2.8%)        | 1(2.2%)        | 1(3.8%)         | 0.999            |
| DMARDs                              | 40(56.3%)      | 27(60.0%)      | 13(50.0%)       | 0.413            |
| Biologics                           | 11(15.5%)      | 7(15.6%)       | 4(15.4%)        | 0.999            |
| Biomarkers                          |                |                |                 |                  |
| Detectable IL-33, n (%)             | 11(15.5%)      | 8(17.8%)       | 3(11.5%)        | 0.735            |
| sST2 (ng/ml)                        | <b>8.7±3.8</b> | <b>7.4±3.0</b> | <b>10.9±3.9</b> | <b>&lt;0.001</b> |

---

VAS: visual analogue scale, PASI: Psoriasis Area and Severity Index, HAQ:

Health Assessment Questionnaire, MDA: minimal disease activity, ESR:

erythrocyte sedimentation rate, CRP: c-reactive protein, CV: cardiovascular, BMI: body mass index, BP: blood pressure, HDL: high-density lipoprotein, NSAIDs: nonsteroidal anti-inflammatory drugs, DMARDs: disease-modifying antirheumatic drugs.

Values are the number (percentage) or median (interquartile range) or mean $\pm$ SD.

Supplementary Table 2. Univariate and multivariate analysis for factors associated with presence of carotid plaque in patients without cardiovascular diseases (n=71)

|                                         | Univariate |             |                | Multivariate |                    |                |
|-----------------------------------------|------------|-------------|----------------|--------------|--------------------|----------------|
|                                         | OR         | 95% CI      | <i>P</i> value | OR           | 95% CI             | <i>P</i> value |
| Age (years)                             | 1.072      | 1.009-1.138 | 0.024          | <b>1.091</b> | <b>1.000-1.191</b> | <b>0.049</b>   |
| Disease duration (years)                | 1.112      | 1.030-1.201 | 0.007          | <b>1.100</b> | <b>1.004-1.205</b> | <b>0.041</b>   |
| Framingham 10-year CVD risk > 10%, n(%) | 3.200      | 1.172-8.735 | 0.023          | 0.991        | 0.239-4.112        | 0.991          |
| sST2 (ng/ml)                            | 1.334      | 1.129-1.576 | 0.001          | <b>1.431</b> | <b>1.162-1.763</b> | <b>0.001</b>   |

Supplementary Figure 1. ROC curve for discriminating patients with or without carotid plaque in patients without cardiovascular diseases (n=71)

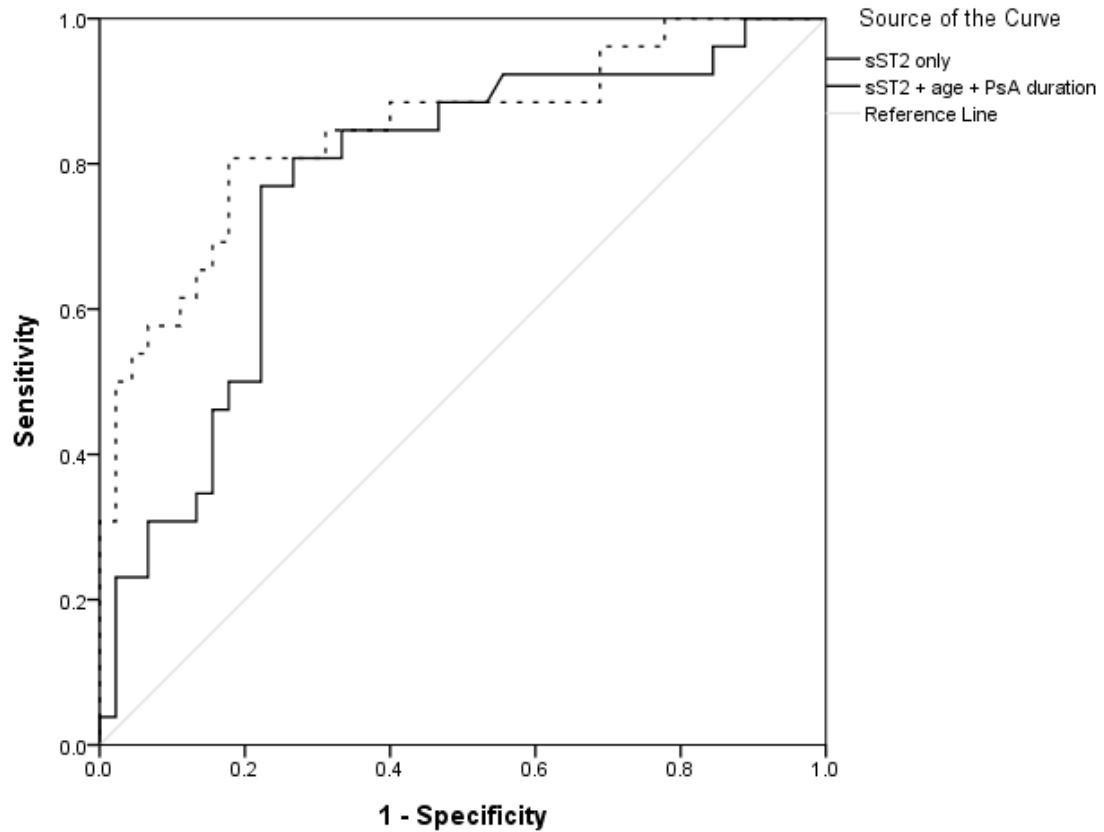

The 2 independent risk factors in the multivariate analysis (sST2 and age) were used to generate a combined predictive score for plaque using logistic regression. Line: Plasma sST2 level only; AUROC: 0.772 (95% CI: [0.657, 0.887];  $P < 0.001$ );

Dots: Predictive value combined by plasma sST2 level and age; AUROC: 0.845 (95% CI: [0.746, 0.945];  $P < 0.001$ ).
